# Supplementary material for: Association Between Timing of Speech and Language Therapy Initiation and Outcomes Among Post-Extubation Dysphagia Patients: A Multicenter Retrospective Cohort Study
Source: Research Square preprint supplement (doi:10.21203/rs.3.rs-1209388/v1), 2022-01-03
Supplement: Supplementary file 8 [file 5c207d286cd4afd66c7919a4.docx]

**Table 3.** Multivariable logistic regression analysis of association between the timing of SLT initiation and outcomes.

Outcomes All (n=272) Unadjusted OR (95% CI) p-value Adjusted OR (95% CI) p-value

**Primary Outcomes**

Dysphagia or death on hospital discharge, n (%) 82 (30.1) 1.12 (1.04-1.20) 0.002 1.09 (1.02-1.18) 0.009

**Secondary Outcomes**

Dysphagia or death at the 7th day after extubation, n (%) 188 (69.1) 1.36 (1.13-1.65) 0.001 1.28 (1.05-1.55) 0.011

Dysphagia or death at the 14th day after extubation, n (%) a 137 (51.8) 1.38 (1.18-1.61) <0.001 1.34 (1.13-1.58) <0.001

Dysphagia or death at the 28th day after extubation, n (%) b 92 (42.9) 1.21 (1.08-1.36) 0.001 1.21 (1.07-1.36) 0.001

Aspiration pneumonia after extubation, n (%) 79 (29.0) 1.11 (1.04-1.19) 0.002 1.09 (1.02-1.17) 0.012

In-hospital mortality, n (%) 31 (11.4) 1.04 (0.98-1.11) 0.135 1.04 (0.97-1.12) 0.203

Variables for the outcomes in the multivariable logistic regression included timing of SLT initiation, institutions, age, ICU admission type, pre-existing dementia, cerebrovascular disease, duration of mechanical ventilation, delirium on the day of extubation, SOFA score on the day of extubation, EN, and PN. SLT: speech and language therapy, CI: confidence interval, OR: odds ratio, ICU: intensive care unit, SOFA: sequential organ failure assessment, EN: enteral nutrition, PN: parenteral nutrition

a. Of 272 patients, eight were missing.

b. Of 272 patients, 58 were missing.
